# Supplementary material for: Common and Unique Network Dynamics in Football Games
Source: PubMed Central journal article supplement (PMC3247158; doi:10.1371/journal.pone.0029638), 2011-12-28

# 2006 Kirin challenge cup Japan vs. Ghana

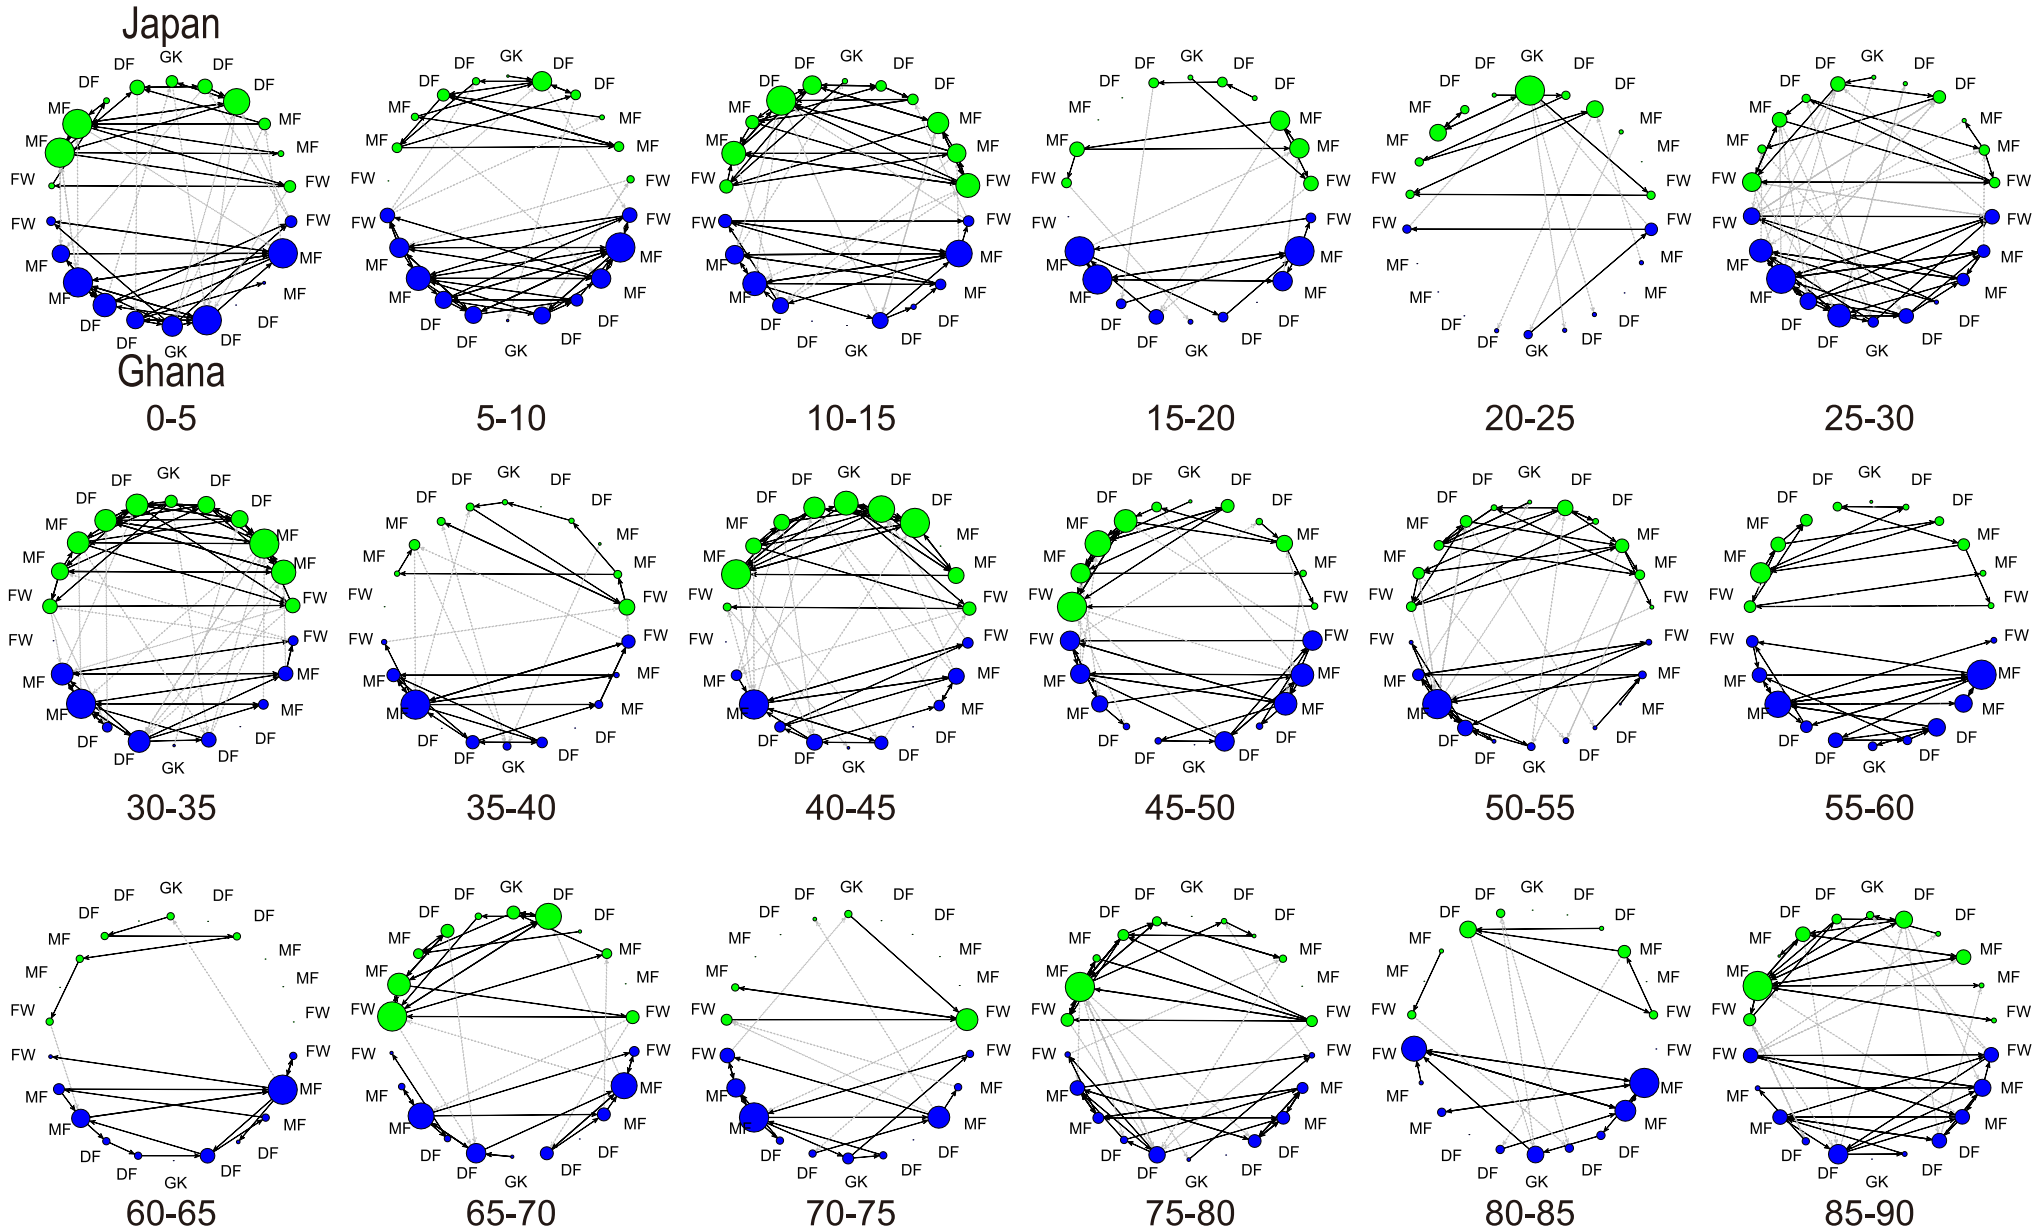

Supplement: pone.0029638.s002.pdf [file pone.0029638.s002.pdf]
