# Supplementary material for: Common and Unique Network Dynamics in Football Games
Source: PubMed Central journal article supplement (PMC3247158; doi:10.1371/journal.pone.0029638), 2011-12-28
Supplement: pone.0029638.s003.pdf [file pone.0029638.s003.pdf]

Table S 1: **Tests of power-law distributions against the exponential and the power law with cut-off distributions.** LR denotes the log-likelihood ratio under two competing distributions. Statistically significant  $p$ -values are denoted in **bold**.

| 2006 World cup |     |     | Power law   | Exponential |             | Power law+cut-off |             | Support for  |
|----------------|-----|-----|-------------|-------------|-------------|-------------------|-------------|--------------|
|                |     |     | $p$         | LR          | $p$         | LR                | $p$         | power law    |
| Italy          | 1st | Out | 0.08        | -2.048      | <b>0.04</b> | -3.512            | <b>0.01</b> | with cut-off |
|                |     | In  | 0.01        | -2.593      | <b>0.01</b> | -4.661            | <b>0.00</b> | with cut-off |
|                | 2nd | Out | <b>0.51</b> | -0.126      | 0.90        | -0.285            | 0.45        | good         |
|                |     | In  | 0.00        | -3.699      | <b>0.00</b> | -6.940            | <b>0.00</b> | with cut-off |
| France         | 1st | Out | 0.05        | -2.110      | <b>0.03</b> | -3.134            | <b>0.01</b> | with cut-off |
|                |     | In  | <b>0.23</b> | -1.700      | 0.09        | -1.196            | 0.12        | good         |
|                | 2nd | Out | <b>0.32</b> | -0.921      | 0.36        | -1.812            | <b>0.06</b> | moderate     |
|                |     | In  | 0.09        | -2.048      | <b>0.04</b> | -2.570            | <b>0.02</b> | with cut-off |
| 2006 Kirin cup |     |     | $p$         | LR          | $p$         | LR                | $p$         |              |
| Japan          | 1st | Out | 0.00        | -4.159      | <b>0.00</b> | -9.444            | <b>0.00</b> | with cut-off |
|                |     | In  | <b>0.45</b> | -2.318      | <b>0.02</b> | -2.689            | <b>0.02</b> | moderate     |
|                | 2nd | Out | <b>0.21</b> | -1.011      | 0.31        | -1.833            | <b>0.06</b> | moderate     |
|                |     | In  | <b>0.19</b> | -1.305      | 0.19        | -1.351            | 0.10        | good         |
| Ghana          | 1st | Out | 0.03        | -2.370      | <b>0.02</b> | -1.778            | <b>0.06</b> | none         |
|                |     | In  | <b>0.39</b> | -1.330      | 0.18        | -1.726            | <b>0.06</b> | moderate     |
|                | 2nd | Out | 0.04        | -2.720      | <b>0.01</b> | -3.178            | <b>0.01</b> | with cut-off |
|                |     | In  | 0.00        | -3.552      | <b>0.00</b> | -7.917            | <b>0.00</b> | with cut-off |
