# Supplementary material for: Common and Unique Network Dynamics in Football Games
Source: PubMed Central journal article supplement (PMC3247158; doi:10.1371/journal.pone.0029638), 2011-12-28
Supplement: pone.0029638.s004.pdf [file pone.0029638.s004.pdf]

Table S 2: Numbers of outgoing and incoming passes per player in World Cup 2006.

| Italy |          |     |     |          |     |     | France |          |     |     |          |     |     |
|-------|----------|-----|-----|----------|-----|-----|--------|----------|-----|-----|----------|-----|-----|
| Pos.  | 1st half |     |     | 2nd half |     |     | Pos.   | 1st half |     |     | 2nd half |     |     |
|       | Out      | In  | sum | Out      | In  | sum |        | Out      | In  | sum | Out      | In  | sum |
| GK    | 3        | 2   | 5   | 11       | 5   | 16  | GK     | 11       | 7   | 18  | 6        | 3   | 9   |
| DF    | 11       | 12  | 23  | 19       | 14  | 33  | DF     | 13       | 10  | 23  | 12       | 6   | 18  |
| DF    | 15       | 10  | 25  | 17       | 10  | 27  | DF     | 21       | 15  | 36  | 19       | 12  | 31  |
| DF    | 13       | 13  | 26  | 20       | 18  | 38  | DF     | 14       | 10  | 24  | 24       | 23  | 47  |
| DF    | 22       | 15  | 37  | 12       | 10  | 22  | DF     | 13       | 11  | 24  | 10       | 6   | 16  |
| MF    | 29       | 31  | 60  | 28       | 23  | 51  | MF     | 17       | 17  | 34  | 12       | 8   | 20  |
| MF    | 3        | 4   | 7   | 18       | 16  | 34  | MF     | 14       | 22  | 36  | 24       | 23  | 47  |
| MF    | 17       | 23  | 40  | 13       | 21  | 34  | MF     | 12       | 12  | 24  | 27       | 25  | 52  |
| MF    | 23       | 19  | 42  | 23       | 22  | 45  | MF     | 8        | 15  | 23  | 15       | 22  | 37  |
| FW    | 6        | 8   | 14  | 5        | 15  | 20  | FW     | 14       | 17  | 31  | 16       | 26  | 42  |
| FW    | 5        | 10  | 15  | 5        | 17  | 22  | FW     | 11       | 12  | 23  | 8        | 19  | 27  |
| sum   | 147      | 147 | 294 | 171      | 171 | 342 | sum    | 148      | 148 | 296 | 173      | 173 | 346 |
