# Supplementary material for: Common and Unique Network Dynamics in Football Games
Source: PubMed Central journal article supplement (PMC3247158; doi:10.1371/journal.pone.0029638), 2011-12-28
Supplement: pone.0029638.s005.pdf [file pone.0029638.s005.pdf]

Table S 3: Numbers of outgoing and incoming passes per player in Kirin Cup 2006.

| Japan |          |     |     |          |     |     | Ghana |          |     |     |          |     |     |
|-------|----------|-----|-----|----------|-----|-----|-------|----------|-----|-----|----------|-----|-----|
| Pos.  | 1st half |     |     | 2nd half |     |     | Pos.  | 1st half |     |     | 2nd half |     |     |
|       | Out      | In  | sum | Out      | In  | sum |       | Out      | In  | sum | Out      | In  | sum |
| GK    | 15       | 9   | 24  | 12       | 6   | 18  | GK    | 6        | 3   | 9   | 10       | 4   | 14  |
| DF    | 21       | 18  | 39  | 9        | 4   | 13  | DF    | 5        | 4   | 9   | 15       | 13  | 28  |
| DF    | 20       | 20  | 40  | 17       | 17  | 34  | DF    | 24       | 15  | 39  | 17       | 10  | 27  |
| DF    | 13       | 12  | 25  | 12       | 12  | 24  | DF    | 20       | 15  | 35  | 11       | 9   | 20  |
| MF    | 23       | 19  | 42  | 10       | 9   | 19  | DF    | 20       | 16  | 36  | 12       | 12  | 24  |
| MF    | 18       | 17  | 35  | 20       | 13  | 33  | MF    | 17       | 19  | 36  | 22       | 26  | 48  |
| MF    | 24       | 27  | 51  | 27       | 30  | 57  | MF    | 44       | 40  | 84  | 36       | 35  | 71  |
| MF    | 22       | 18  | 40  | 1        | 5   | 6   | MF    | 30       | 35  | 65  | 32       | 32  | 64  |
| MF    | 20       | 22  | 42  | 19       | 21  | 40  | MF    | 25       | 26  | 51  | 21       | 20  | 41  |
| FW    | 6        | 15  | 21  | 14       | 21  | 35  | FW    | 10       | 19  | 29  | 8        | 15  | 23  |
| FW    | 15       | 20  | 35  | 10       | 13  | 23  | FW    | 4        | 13  | 17  | 13       | 21  | 34  |
| sum   | 197      | 197 | 394 | 151      | 151 | 302 | sum   | 205      | 205 | 410 | 197      | 197 | 394 |
